# Supplementary material
Source: PubMed Central journal article supplement (PMC3448828)

Supplementary Figure 2

Kwek et. al.

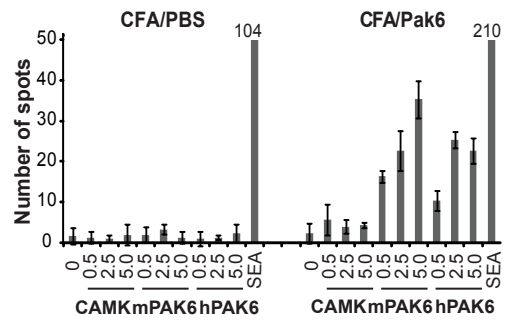

Supplement: NIHMS398786-supplement-3.pdf [file NIHMS398786-supplement-3.pdf]
